# Supplementary material
Source: Springer Nature journal article supplement (https://www.springermedizin.de/resource/supplementary/12990_2009_266_MOESM1_ESM.pdf/9613046)

**A**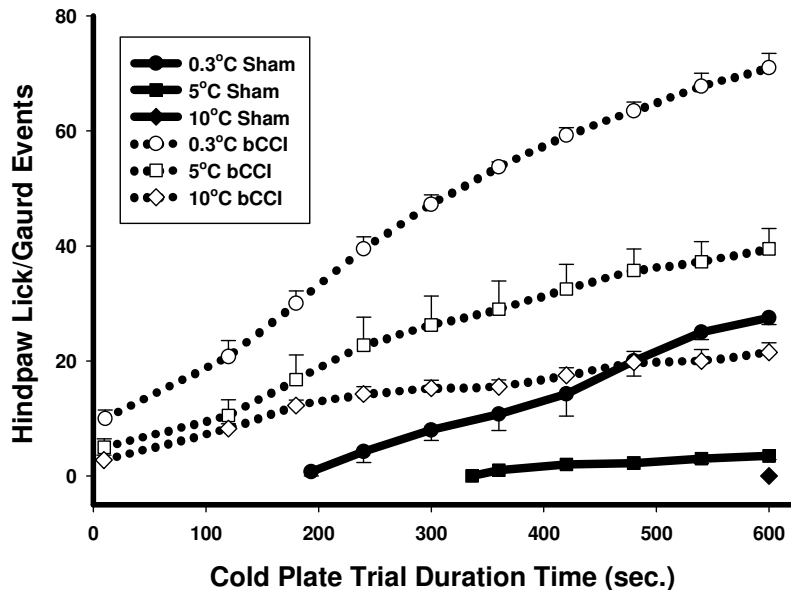**B**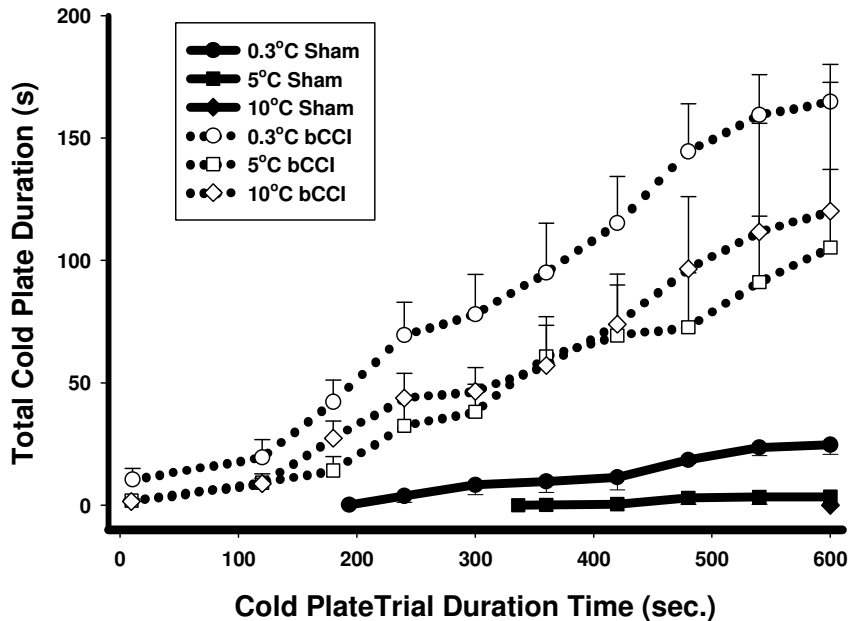

Supplement: MOESM1 [file 9613046]
